# Supplementary material
Source: Springer Nature journal article supplement (https://www.springermedizin.de/resource/supplementary/12985_2007_361_MOESM3_ESM.pdf/9607818)

A

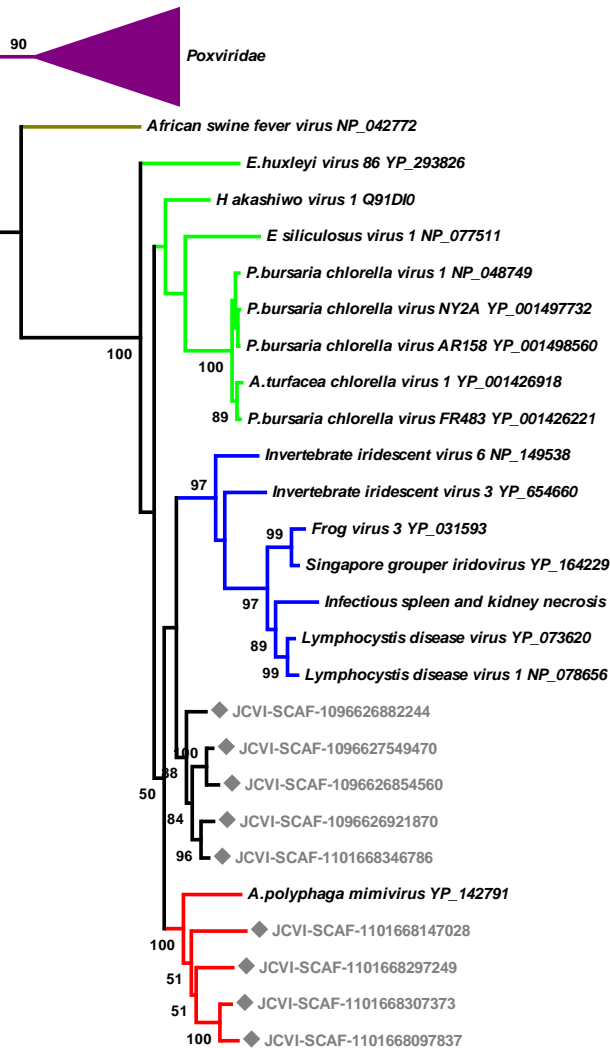

B

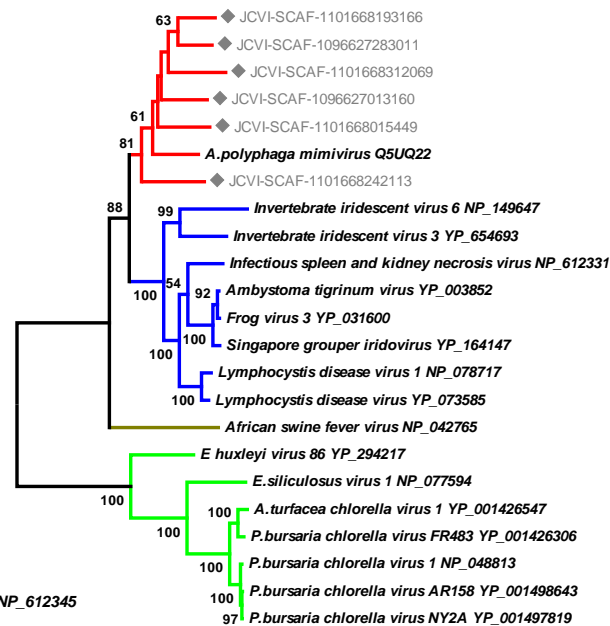

1

0.5

Supplement: MOESM3 [file 9607818]
